1 Disparate evolution of virus populations in upper and lower airways of  
2 mechanically ventilated patients.

3 Björn F. Koel<sup>1\*</sup>, Frank van Someren Gréve<sup>1</sup>, René M. Vigeveno<sup>1</sup>, Maarten Pater<sup>1</sup>, Colin A.  
4 Russell<sup>1</sup>, Menno D. de Jong<sup>1</sup>

5

6 <sup>1</sup>Department of Medical Microbiology, Amsterdam UMC, University of Amsterdam,  
7 Amsterdam, The Netherlands

8 \* Correspondence: [b.f.koel@amc.uva.nl](mailto:b.f.koel@amc.uva.nl)

9

10 Running title: Distinct virus populations in human upper and lower airways.

## Abstract

In routine surveillance and diagnostic testing, influenza virus samples are typically collected only from the upper respiratory tract (URT) due to the invasiveness of sample collection from the lower airways. Very little is known about virus variation in the lower respiratory tract (LRT) and it remains unclear if the virus populations at different sites of the human airways may develop to have divergent genetic signatures. We used deep sequencing of serially obtained matched nasopharyngeal swabs and endotracheal aspirates from four mechanically ventilated patients with influenza A/H3N2 infections. A physical barrier separating both compartments of the respiratory tract introduced as part of the medical procedures enabled us to track and compare the genetic composition of the virus populations during isolated evolution in the same host. Amino acid variants reaching majority proportions emerged during the course of infection in both nasopharyngeal swabs and endotracheal aspirates, and amino acid variation was observed in all influenza virus proteins. Genetic variation of the virus populations differed between the URT and LRT and variants were frequently uniquely present in either URT or LRT virus populations of a patient. These observations indicate that virus populations in spatially distinct parts of the human airways may follow different evolutionary trajectories. Selectively sampling from the URT may therefore fail to detect potentially important emerging variants.

## Importance

Influenza viruses are rapidly mutating pathogens that easily adapt to changing environments. Although advances in sequencing technology make it possible to identify virus variants at very low proportions of the within-host virus population, several aspects of intrahost viral evolution have not been studied because sequentially collected samples and samples from the lower respiratory tract are not routinely obtained for influenza surveillance or clinical diagnostic purposes. Importantly, how virus populations evolve in different parts of the human respiratory tract remains unknown. Here we used serial clinical specimens collected from mechanically ventilated influenza patients to compare how virus populations develop in the upper and lower respiratory tract. We show that virus populations in the upper and lower respiratory tract may evolve along distinct evolutionary pathways, and that current sampling and surveillance regimens likely capture only part of the complete intrahost virus variation.

## 11 **Introduction**

12 Influenza A viruses are genetically variable due to the low fidelity of the influenza virus RNA  
13 polymerase and can therefore quickly evolve in response to changing environments and selection  
14 pressures, leading to escape from natural or vaccine-induced immunity, antiviral drug resistance  
15 and adaptation to new hosts. Intra-host influenza virus populations are genetically heterogeneous  
16 and consist of closely related but diverse virus variants. The evolution of influenza viruses has  
17 been studied in much detail at population levels on a global scale, but the intra-host evolutionary  
18 processes that are fundamental to emergence of new variants in the human population are less  
19 well understood.

20  
21 Influenza viruses can infect and replicate in epithelial cells throughout the upper (URT) and lower  
22 respiratory tract (LRT) (1, 2). Differences between cell types and receptor distribution along the  
23 respiratory tract, as well as local conditions such as temperature and immunity, may favor the  
24 emergence of different variants in different compartments of the human airways. Recent studies  
25 indeed suggest compartmentalization of seasonal influenza viruses in the URT and LRT. Richard  
26 *et al.* reported that intranasal and intratracheal co-inoculation of ferrets resulted in minimal  
27 reassortment of the inoculated viruses (3), and Yan *et al.* found that URT and LRT infections  
28 appeared to behave as independent virus populations based on aerosol shedding of human  
29 volunteers (4). Although these studies provide clues that virus populations in spatially separated  
30 compartments of the respiratory tract may evolve independently, current insights into potential  
31 differences in genetic composition and evolution of virus populations between URT and LRT  
32 compartments remain incomplete.

33  
34 Improved understanding would ideally require analyses of serial specimens collected in parallel  
35 from both respiratory compartments during the course of influenza, the feasibility of which is  
36 challenging due to the invasiveness of such sampling. We had an opportunity to perform such  
37 analyses in four influenza A/H3N2 virus-infected patients who participated in a study of the  
38 prevalence and shedding patterns of respiratory viruses in critically ill patients receiving  
39 mechanical ventilation (5, 6). For the purpose of this study, nasopharyngeal specimens and  
40 endotracheal aspirates were collected each day from patients while intubated and ventilated.  
41 Endotracheal tubes used for mechanical ventilation contain a balloon cuff designed to provide a  
42 seal inside the trachea that allows airflow through the tube whilst preventing passage of air or  
43 fluids around it. Importantly, this feature allowed analysis of virus populations in upper and lower  
44 respiratory tract compartments in isolation. Using a next generation sequencing approach, virus

45 populations from both compartments were thus characterized over time, providing evidence  
46 indicating differences in genetic composition and diversity .

47

## 48 **Results**

### 49 **Limited genetic variation in virus populations from nasopharyngeal swabs and** 50 **endotracheal aspirates**

51 Matched nasopharyngeal swabs (NPS) and endotracheal aspirates (ETA) were collected daily  
52 from mechanically ventilated patients in the context of a Dutch multicenter observational clinical  
53 study investigating the prevalence and shedding patterns of respiratory viruses in critically ill  
54 patients (5, 6). For the current study we selected all patients with laboratory-confirmed influenza  
55 A/H3N2 virus infections in whom viral RNA could be detected in paired NPS and ETA specimens  
56 during at least 2 consecutive days. In NPS and ETA from the four patients thus included, influenza  
57 virus RNA was detected during respectively 3 - 7 days and 3 - 26 days following intubation (Fig.  
58 1, Fig. S1). Whole genome next generation sequencing (NGS) was performed directly on all virus  
59 positive samples to quantify the within-host genetic variation and changes in amino acid variant  
60 frequency over time. Genomic data of sufficient quality were obtained from 51 samples in total. To  
61 limit inclusion of artifactual variants introduced during library preparation or sequencing, variants  
62 were only considered for analyses if present in the virus population during multiple days.

63

64 There was limited but evident genetic variation in the intrahost virus populations in the four  
65 patients. We identified 31 amino acid variants in the NPS and 34 amino acid variants in the ETA  
66 collected among the four patients (Fig 2). Variations in NPS occurred on 28 unique amino acid  
67 positions on all but the M1 and NP proteins (Fig 2A). In ETA, variants on 26 unique amino acid  
68 positions were found and occurred on all but the PA-X, NS2, and PB1-F2 proteins (Fig. 2B). To  
69 identify temporal differences in variant proportions, we arbitrarily set a 5% threshold value for what  
70 constitutes a substantial variant proportion difference between same-patient NPS or ETA  
71 samples. The difference between minimum and maximum variant proportions exceeded this  
72 threshold for 20 variants in NPS and 28 variants in the ETA (Figs. 2C and 2D, Figs S2-S5).  
73 Changes in variant proportion fluctuated over time. Variant proportion differences of 15 – 20%  
74 between consecutive days were observed in all four patients (Figs S2-S5). However, most  
75 variants showed short-lived changes in variant proportion, typically reaching 10 - 20% in the virus  
76 population. Few variants persisted at low proportions (<10%) for several days or reached  
77 proportions above 20%. Four variants reached majority in the virus population (>50%)—HA G5E  
78 (NPS, patient X), NS1 H59L (NPS, patient X), NA E76D (NPS, patient Y), and NS1 L185F (ETA,

79 patient W). However, consistent outgrowth during sampling was observed only for NS1 H59L,  
80 whereas the variant proportions of HA G5E and NS1 L185F dropped below the detection limit  
81 within days after reaching majority. We could not determine evolutionary patterns for the duration  
82 of infection for NA E76D because the coverage of this genetic region was below our inclusion  
83 threshold for three out of five days.

84

### 85 **Virus populations in nasopharyngeal swabs and endotracheal aspirates are genetically** 86 **diverse**

87 To determine whether the genetic composition of the virus populations in NPS and ETA was  
88 different, we next analyzed variant proportions in time- and patient matched NPS and ETA. For  
89 this analysis we included the variants that were detectable during multiple days and where the  
90 difference between variant proportions in NPS and ETA exceeded 5%.

91

92 Panels A and B of figure 3 show for each of the patients the variants present in NPS and ETA at  
93 the first day of sample collection. Variants that met our inclusion criteria and that were unique to  
94 either NPS or ETA were observed in all four patients, albeit at moderate proportions. Variants  
95 present in both NPS and ETA similarly showed moderate differences in variant proportions  
96 between NPS and ETA samples. Because our analysis of temporal differences in variant  
97 proportion indicated that the virus populations in these patients evolved over time, we repeated  
98 the analysis using for each patient the samples collected at the last time point where influenza  
99 virus-positive NPS and ETA were available (Fig. 3 panels C and D). Also here, variant proportions  
100 in the NPS and ETA were genetically different in all patients, and included variants that were  
101 present in only one airway compartment. These results show that the genetic composition of the  
102 virus populations in NPS and ETA was different during identical periods after intubation in all four  
103 patients.

104

105 The analysis of differences between the virus populations in NPS and ETA revealed a number of  
106 notable variants. Two of the four variants that reach majority proportions, HA G5E and NA E76D,  
107 were uniquely observed in the NPS of patients X and Y, respectively (Figs. S3 and S4) . The  
108 remaining two variants that reach majority proportions, NS1 H59L and NS1 L185F, reach peak  
109 variant proportions while being undetectable in the other airway compartment at matched time  
110 points. In addition, these variants were present and continued to vary in proportion in ETA after  
111 the virus became undetectable in NPS, as was also the case for HA N144K (Fig. 4, and Figs. S2  
112 and S3). Finally, a variant with a truncation of the M2 cytoplasmic tail, M2 R77stop, was observed

113 in all four patients and was absent only from NPS from patient Y (Figs. S2-S5). Variant proportions  
114 of M2 R77stop were mostly different between same-patient time-matched NPS and ETA samples.  
115 Like the variants outlined in Fig 4, M2 R77Stop remained present and reached high variant  
116 proportions in ETA samples of patients W and X after NPS samples became virus negative.

117

## 118 **Discussion**

119 Meaningfully studying intrahost genetic variation of human influenza A virus populations has  
120 become possible in the past few years as a result of progress in sequencing technologies. Multiple  
121 groups have now used deep sequencing approaches to determine the genetic variation of human  
122 influenza A viruses in patient-derived materials. These studies have mostly focused on variation  
123 in relation to immune escape because of the major role of this process in influenza virus evolution  
124 (7–9), or on better understanding transmission bottlenecks and stringency of intrahost selection  
125 pressures (10–12). The scarcity of sequentially collected clinical specimens accessible for  
126 scientific purposes, particularly those obtained from the lower respiratory tract, has limited the  
127 opportunities for studying the temporal genetic variation of within-host influenza virus populations  
128 (9, 13, 14). Here we had the opportunity to study intrahost viral genetic variation in longitudinally  
129 collected nasopharyngeal swabs and endotracheal aspirates of individuals in whom upper and  
130 lower airway compartments were separated by a physical barrier due to mechanical ventilation.  
131 We evaluated the intrahost evolutionary patterns of influenza A/H3N2 virus in both airway  
132 compartments and compared the genetic composition of the virus populations in the upper and  
133 lower airways .

134

135 Our results indicate intrahost viral genetic diversity and temporal differences in the composition of  
136 the virus populations in the URT and in the LRT of all patients. The modest number of variants  
137 observed in each patient is in concordance with previous studies that reported limited genetic  
138 variation based on studies using single time points (7, 8, 10). Nonetheless, we observed outgrowth  
139 of several variants towards or above majority proportions, often reaching peak proportions within  
140 a week after the start of sample collection. Our data also point out that variants may reach majority  
141 proportions in both airway compartments. These outcomes suggest that substantial genetic  
142 changes in the influenza A virus populations of the URT and LRT can take place during the short  
143 time periods typical of transient influenza virus infections.

144

145 The different variants and variant proportions detected in URT and LRT samples indicates that  
146 genetically related but distinct virus populations existed in the upper and lower airway

147 compartments of the patients included in this study. Our finding that distinct viral genotypes  
148 frequently existed in one but not the other airway compartment complements a recent study that  
149 demonstrated spatial separation of the virus populations in humans without the mechanical barrier  
150 that was present in the patients sampled for the current study (4). That work showed that humans  
151 generate infectious aerosols that represent infection of the LRT and that viral load in URT samples  
152 poorly predicted shedding of virus in aerosols. Here we show that virus populations in distal parts  
153 of the human airways were composed of distinct viral genotypes that followed isolated evolutionary  
154 pathways. If aerosols support influenza virus transmission, the results of the current study imply  
155 that variants originating from the lower airways may contribute to long-term (interhost) virus  
156 evolution. The differences between genetic compositions of virus populations in the URT and LRT,  
157 even during matched time points, suggests that genetic analysis of the virus population in URT  
158 samples is a poor proxy for genetic variation in the LRT virus population. Given that current  
159 sampling regimens rarely include sample collection from the LRT, a potentially important  
160 evolutionary setting may be almost entirely unexplored.

161  
162 While it is plausible that the distinct physiological conditions and receptor distributions in the URT  
163 and LRT gives rise to site specific variants, identification of adaptive amino acid changes resulting  
164 from selection pressures specific to either compartment was precluded by the limited number of  
165 patients in this study. However, HA N144K, HA R229K, NA V251I, and NS1 L185F have been  
166 associated with antibody evasion or immune modulation (15–20), which may explain the rapid  
167 increase in variant proportion of some of these variants. Our findings are in agreement with  
168 previous results that reported limited variation on amino acid positions associated with immune  
169 escape (7–9, 12), and studies that suggested that antigenic adaptation is unlikely to be a major  
170 mechanism responsible for intrahost genetic variation (8). Additionally, truncation of M2 at position  
171 77 was shown to have no impact on ion-channel activity (21), suggesting that this amino acid  
172 variation may also have been phenotypically neutral in the viruses observed in this study. The  
173 phenotypic effects of other notable variants, including those reaching majority proportions, have  
174 to our knowledge not been reported.

175  
176 In summary, we showed disparate evolution of virus populations in spatially separated parts of the  
177 human airways following natural infection with a seasonal human influenza virus. The temporal  
178 variability and genetic differences between intrahost virus populations puts into question the  
179 significance of samples collected at a single site or at a single time point. Timing, duration, and  
180 site of sample collection are critical variables that could affect the outcomes of influenza



181 surveillance, and of studies into influenza disease and virus evolution. This is especially true for  
182 studies looking into intrahost genetic diversity using deep sequencing approaches.

183

## 184 **Materials and Methods**

### 185 **Patients and samples**

186 The samples used in this study were collected as part of a multicenter prospective observational  
187 study performed in The Netherlands (Dutch Trial Register NTR4102) as described previously  
188 (22). A waiver from the Medical Research Involving Humans Act was provided by the Institutional  
189 Review Board of the Academic Medical Center, Amsterdam, due to non-invasiveness of study  
190 procedures. Patients and/or their legal representatives were provided with written study  
191 information at ICU admission, and could opt-out of the study participation. Included were critically  
192 ill patients requiring intubation and mechanical ventilation, admitted to the participating ICUs  
193 between April 2013 and April 2014. Daily nasopharyngeal NPS and tracheobronchial ETA were  
194 collected until detubation or death while on mechanical ventilation. All samples obtained upon  
195 admission were tested with a validated multiplex RT-PCR for respiratory viruses, as previously  
196 described (23, 24). For the current study, all patients that were influenza A/H3N2 virus positive for  
197 multiple days positive were included. Intubation and sampling of patients X,Y, and Z started at the  
198 day of admission to the ICU. Patient W had been admitted to the ICU for 6 days prior to the start  
199 of intubation and sampling. Patient characteristics are available from Table S1. Viral loads for all  
200 patients and time points are indicated in figure S1.

201

### 202 **Library preparation and deep sequencing**

203 Total RNA was extracted from the clinical specimens using the High Pure RNA isolation kit  
204 (Roche, 11828665001) according to manufacturer's instructions. Influenza RNAs were reverse  
205 transcribed and amplified using the superscript III One-Step RT PCR Platinum Taq High Fidelity  
206 DNA Polymerase (ThermoFisher, 12574030) and A(H3N2) virus subtype and gene segment  
207 specific primers (Table S3). For whole genome amplification we performed 20 independent PCR  
208 reactions in total. Three partly overlapping amplicons were generated for the PB2, PB1, PA, HA,  
209 NA and NP segments each, a single amplicon each was generated for the M and NS gene  
210 segments. For each sample, PCR products were pooled in equimolar concentrations and  
211 subsequently purified using Agencourt Ampure XP beads (Beckman Coulter, A63882) and  
212 quantified using the Qubit dsDNA HS assay kit (ThermoFisher, Q32854). Pooled and cleaned  
213 amplicons were diluted to 0.2 ng/μl for subsequent library preparation.

214



215 Sequencing libraries were prepared using the Nextera XT DNA Library Preparation kit (Illumina,  
216 FC-131-1096) according to manufacturer's instructions. Briefly, for each sample 5 µl of diluted  
217 amplicons were enzymatically fragmented and Illumina adapters were ligated to the fragments.  
218 Subsequently each sample was purified twice using Agencourt Ampure XP beads. Library size  
219 distribution was evaluated using the High sensitivity dsDNA kit on a 2100 Bioanalyzer (Agilent,  
220 5067-4626) and qPCR based library quantification was performed using the KAPA Library  
221 Quantification kit for Illumina platforms (KAPA Biosystems, KK4824) on a LightCycler480 (Roche).  
222 Normalized library pools were sequenced on an Illumina MiSeq machine using the 600-cycle  
223 MiSeq Reagent Kit v3 (Illumina, MS-102-3003). All FASTQ files are available on request.

224

### 225 **Quality control, variant detection and data analysis**

226 Quality trimming of Illumina MiSeq reads was performed using the Maximum Information quality  
227 filtering approach of the Trimmomatic tool (version 0.36, parameters; leading:3, trailing:3,  
228 maxinfo: 80:0.4, crop:280) (25). Merging, mapping, and coverage analysis was done using the  
229 BBmerge, BBwrap, and pileup scripts from the BBDMap bioinformatics toolkit version 36.27 (26).  
230 Read pairs with inappropriate orientation and reads with a Q-score below 25 were discarded.  
231 Quality control was monitored using FastQC version v0.11.5 (27).

232

233 Subsequent steps were performed using a set of custom scripts (available on request). Mapped  
234 reads were translated and prepared for variant calling by identification of appropriate reading  
235 frames and conversion of read numbering to protein numbering for the 12 influenza A virus  
236 proteins considered here; PB2 (polymerase basic 2), PB1 (polymerase basic 1), PA (polymerase  
237 acidic), HA (hemagglutinin), NP (nucleoprotein), NA (neuraminidase), M1 (matrix protein 1), PA-  
238 X (polymerase acidic protein-X), NS1 (non-structural protein 1), NS2 (nuclear export protein), M2  
239 (matrix 2 ion channel), and PB1-F2 (PB1 frame 2). HA amino acid positions in the manuscript are  
240 numbered according to Burke *et al.* (28). For each patient the data on coverage per position,  
241 variant count, and variant proportion was collected for all time points and for URT and LRT  
242 samples. Next a number of filtering steps was performed. Variants passing filter were outside of  
243 primer regions, had a minimum coverage of 100x for each position in the codon, and were present  
244 at at least 1% of the total virus population with a minimum of five observations per sample. All  
245 variants included in our analyses were detectable in two or more samples from the same airway  
246 compartment and reached a variant proportion of at least 5%. Variants identified in the overlapping  
247 regions of the PA gene products (PA and PA-X), M gene products (M1 and M2), and NS gene  
248 products (NS1 and NS2) were called independently.

249

250 **Acknowledgements**

251 This research was supported by ZonMW TOP grant and a Postdoc Stipend of the Amsterdam  
252 Infection and Immunity Institute. The authors are grateful to Sylvie Koekkoek, Silvana Roos,  
253 Matthijs Welkers, Dirk Eggink, Nicole Juffermans, and Marcus Schultz from the AMC Amsterdam,  
254 The Netherlands, and to Frank Harders from the Central Veterinary Institute, The Netherlands, for  
255 assistance and technical support. BFK and MP thank SURFsara ([www.surfsara.nl](http://www.surfsara.nl)) for the support  
256 in using the Lisa Compute Cluster.

- 257 1. Van Riel D, Munster VJ, De Wit E, Rimmelzwaan GF, Fouchier RAM, Osterhaus ADME,  
258 Kuiken T. 2007. Human and avian influenza viruses target different cells in the lower  
259 respiratory tract of humans and other mammals. *Am J Pathol* 171:1215–1223.
- 260 2. Chutinimitkul S, van Riel D, Munster VJ, van den Brand JMA, Rimmelzwaan GF, Kuiken  
261 T, Osterhaus ADME, Fouchier RAM, de Wit E. 2010. In Vitro Assessment of Attachment  
262 Pattern and Replication Efficiency of H5N1 Influenza A Viruses with Altered Receptor  
263 Specificity. *J Virol* 84:6825–6833.
- 264 3. Richard M, Herfst S, Tao H, Jacobs NT, Lowen AC. 2017. Influenza A virus reassortment  
265 is limited by anatomical compartmentalization following co-infection via distinct routes. *J*  
266 *Virology* JVI.02063-17.
- 267 4. Yan J, Grantham M, Pantelic J, Bueno de Mesquita PJ, Albert B, Liu F, Ehrman S, Milton  
268 DK. 2018. Infectious virus in exhaled breath of symptomatic seasonal influenza cases  
269 from a college community. *Proc Natl Acad Sci* 115:1081–1086.
- 270 5. van Someren Gréve F, Ong DSY, Cremer OL, Bonten MJM, Bos LDJ, de Jong MD,  
271 Schultz MJ, Juffermans NP. 2016. Clinical practice of respiratory virus diagnostics in  
272 critically ill patients with a suspected pneumonia: A prospective observational study. *J Clin*  
273 *Virology* 83:37–42.
- 274 6. Van Someren Gréve F, Juffermans NP, Bos LDJ, Binnekade JM, Braber A, Cremer OL,  
275 De Jonge E, Molenkamp R, Ong DSY, Rebers SPH, Spoelstra-De Man AME, Van Der  
276 Sluijs KF, Spronk PE, Verheul KD, De Waard MC, De Wilde RBP, Winters T, De Jong  
277 MD, Schultz MJ. 2018. Respiratory Viruses in Invasively Ventilated Critically Ill Patients-A  
278 Prospective Multicenter Observational Study. *Crit Care Med* 46:29–36.
- 279 7. Dinis JM, Florek NW, Fatola OO, Moncla LH, Mutschler JP, Charlier OK, Meece JK,  
280 Belongia EA, Friedrich TC. 2016. Deep Sequencing Reveals Potential Antigenic Variants  
281 at Low Frequencies in Influenza A Virus-Infected Humans. *J Virol* 90:3355–3365.
- 282 8. Debbink K, McCrone JT, Petrie JG, Truscon R, Johnson E, Mantlo EK, Monto AS, Luring  
283 AS. 2017. Vaccination has minimal impact on the intrahost diversity of H3N2 influenza  
284 viruses. *PLoS Pathog* 13:1–18.
- 285 9. Xue KS, Stevens-Ayers T, Campbell AP, Englund JA, Pergam SA, Boeckh M, Bloom JD.  
286 2017. Parallel evolution of influenza across multiple spatiotemporal scales. *Elife* 6:1–16.
- 287 10. Sobel Leonard A, McClain MT, Smith GJD, Wentworth DE, Halpin RA, Lin X, Ransier A,  
288 Stockwell TB, Das SR, Gilbert AS, Lambkin-Williams R, Ginsburg GS, Woods CW, Koelle  
289 K. 2016. Deep Sequencing of Influenza A Virus from a Human Challenge Study Reveals  
290 a Selective Bottleneck and Only Limited Intrahost Genetic Diversification. *J Virol*

- 291 90:11247–11258.
- 292 11. Poon LLM, Song T, Rosenfeld R, Lin X, Rogers MB, Zhou B, Sebra R, Halpin RA, Guan  
293 Y, Twaddle A, DePasse J V., Stockwell TB, Wentworth DE, Holmes EC, Greenbaum B,  
294 Peiris JSM, Cowling BJ, Ghedin E. 2016. Quantifying influenza virus diversity and  
295 transmission in humans. *Nat Genet* 48:195–200.
- 296 12. McCrone JT, Woods RJ, Martin ET, Malosh RE, Monto AS, Luring AS. 2018. Stochastic  
297 processes constrain the within and between host evolution of influenza virus. *Elife* 7:1–19.
- 298 13. Ghedin E, Laplante J, DePasse J, Wentworth DE, Santos RP, Lepow ML, Porter J,  
299 Stellrecht K, Lin X, Operario D, Griesemer S, Fitch A, Halpin RA, Stockwell TB, Spiro DJ,  
300 Holmes EC, St George K. 2011. Deep sequencing reveals mixed infection with 2009  
301 pandemic influenza A (H1N1) virus strains and the emergence of oseltamivir resistance. *J*  
302 *Infect Dis* 203:168–174.
- 303 14. Rogers MB, Song T, Sebra R, Greenbaum BD, Hamelin ME, Fitch A, Twaddle A, Cui L,  
304 Holmes EC, Boivin G, Ghedina E. 2015. Intrahost dynamics of antiviral resistance in  
305 influenza a virus reflect complex patterns of segment linkage, reassortment, and natural  
306 selection. *MBio* 6:1–8.
- 307 15. Das SR, Hensley SE, Ince WL, Brooke CB, Subba A, Delboy MG, Russ G, Gibbs JS,  
308 Bennink JR, Yewdell JW. 2013. Defining influenza a virus hemagglutinin antigenic drift by  
309 sequential monoclonal antibody selection. *Cell Host Microbe* 13:314–323.
- 310 16. Twu KY, Noah DL, Rao P, Kuo R-L, Krug RM. 2006. The CPSF30 Binding Site on the  
311 NS1A Protein of Influenza A Virus Is a Potential Antiviral Target. *J Virol* 80:3957–3965.
- 312 17. Marc D. 2014. Influenza virus non-structural protein NS1: Interferon antagonism and  
313 beyond. *J Gen Virol* 95:2594–2611.
- 314 18. Koel BF, Burke DF, Bestebroer TM, van der Vliet S, Zondag GCM, Vervaet G, Skepner E,  
315 Lewis NS, Spronken MIJ, Russell CA, Eropkin MY, Hurt AC, Barr IG, de Jong JC,  
316 Rimmelzwaan GF, Osterhaus ADME, Fouchier RAM, Smith DJ. 2013. Substitutions Near  
317 the Receptor Binding Site Determine Major Antigenic Change During Influenza Virus  
318 Evolution. *Science (80- )* 342:976–979.
- 319 19. Venkatramani L, Bochkareva E, Lee JT, Gulati U, Graeme Laver W, Bochkarev A, Air  
320 GM. 2006. An epidemiologically significant epitope of a 1998 human influenza virus  
321 neuraminidase forms a highly hydrated interface in the NA-antibody complex. *J Mol Biol*  
322 356:651–663.
- 323 20. Wiley DC, Wilson IA, Skehel JJ. 1981. Structural identification of the antibody-binding  
324 sites of Hong Kong influenza haemagglutinin and their involvement in antigenic variation.

- 325 Nature 289:373–8.
- 326 21. Tobler K, Kelly ML, Pinto LH, Lamb RA. 1999. Effect of cytoplasmic tail truncations on the  
327 activity of the M(2) ion channel of influenza A virus. *J Virol* 73:9695–701.
- 328 22. Someren Gréve F van, van der Sluijs KF. 2015. Course - Prevalence, Clinical Outcomes  
329 and Viral Shedding Patterns during Viral Respiratory Tract Infections in Intubated  
330 Intensive Care Unit-patients: Design and Protocol. *J Clin Trials* 04.
- 331 23. Jansen RR, Schinkel J, Koekkoek S, Pajkrt D, Beld M, de Jong MD, Molenkamp R. 2011.  
332 Development and evaluation of a four-tube real time multiplex PCR assay covering  
333 fourteen respiratory viruses, and comparison to its corresponding single target  
334 counterparts. *J Clin Virol* 51:179–85.
- 335 24. van de Pol AC, van Loon AM, Wolfs TFW, Jansen NJG, Nijhuis M, Breteler EK,  
336 Schuurman R, Rossen JWA. 2007. Increased detection of respiratory syncytial virus,  
337 influenza viruses, parainfluenza viruses, and adenoviruses with real-time PCR in samples  
338 from patients with respiratory symptoms. *J Clin Microbiol* 45:2260–2.
- 339 25. Bolger AM, Lohse M, Usadel B. 2014. Trimmomatic: A flexible trimmer for Illumina  
340 sequence data. *Bioinformatics* 30:2114–2120.
- 341 26. BMAP short read aligner, and other bioinformatic tools.  
342 <https://sourceforge.net/projects/bbmap/>.
- 343 27. FastQC. <http://www.bioinformatics.babraham.ac.uk/projects/fastqc>.
- 344 28. Burke DF, Smith DJ. 2014. A Recommended Numbering Scheme for Influenza A HA  
345 Subtypes. *PLoS One* 9:e112302.
- 346

**FIG 1** Sample overview (A) Samples were collected daily from the nasopharyngeal (red) and bronchotracheal area (blue) and are referred to here as upper and lower respiratory tract samples, respectively. (B) High quality NGS data were obtained from serially collected samples throughout the course of infection of four patients; W, X, Y, and Z. Samples indicated as grey bars were influenza virus negative or NGS data did not pass quality control during analysis. Numbers in the top row of panel B indicate days since intubation. Patient designation, age and admission date are indicated in the figure. An asterisk indicates the days on which antiviral treatment with oseltamivir was administered.

**FIG 2** Overview of proteins and amino acid positions responsible for diversity in the virus populations in NPS and ETA. Variants are color coded by patient, patient W; red, patient X; green, patient Y; blue, patient Z; purple. (A) Variable amino acid positions identified in NPS indicated on the A/H3N2 virus proteins. Vertical lines indicate amino acid positions at intervals of 100 amino acids. White vertical bars indicate primer regions. (B) As panel A, but showing the variable amino acid positions identified in ETA. (C) Maximum proportion differences of variants in NPS. X-axis labels indicate protein and amino acid positions. The threshold used in the analysis of temporal variation is indicated as a dashed line. Variants with temporal differences in variant proportion exceeding this threshold are listed in Table 1. (D) As panel B, but showing maximum proportion differences of variants in ETA. A/H3N2 virus HA numbering according to Burke *et al.* (28).

**FIG 3** Variant proportions in NPS and ETA at matched time points. Variants are color coded by patient, patient W; red, patient X; green, patient Y; blue, patient Z; purple. Panels (A) and (B) show the variant proportions in NPS and ETA, respectively, at the first day of sample collection. Column headings indicate the proteins in which variation was detected. Variants are labelled by amino acid position. Panels (C) and (D) show the variant proportions of variants in NPS and ETA, respectively, from the last available influenza virus-positive time-matched samples.

**FIG 4** Sustained evolution of variants in the LRT. Blue and green filled areas indicate the proportion of the variant in the URT and LRT, respectively. Filled circles represent the samples included in variant analysis; black dots represent samples with variant proportions above the detection limit, grey dots indicate absence of the variant. (A) evolutionary dynamics of NS1 H59L in patient X. (B) evolutionary dynamics of NS1 L185F in patient W. (C) evolutionary dynamics of HA N144K in patient W.

**FIG S1** Viral load in NPS (blue) and ETA (green) specimens of patients W, X, Y, and Z. Filled circles indicate high quality samples included in variant analysis.

**FIG S2** Evolutionary dynamics of variants showing substantial temporal variation for patient W. Blue on an orange background indicates the proportion of the variant in the URT, green on a brown background indicates the proportion of the variant in the LRT. Filled circles represent the samples included in variant analysis. The protein and variant are indicated in the figures. Capital letters indicate the amino acid that is the majority amino acid on a given position, small letters indicate the minority variant.

**FIG S3** Evolutionary dynamics of variants showing substantial temporal variation for patient X. Symbols and colors as in Fig S2.

**FIG S4** Evolutionary dynamics of variants showing substantial temporal variation for patient Y. Symbols and colors as in Fig S2.

**FIG S5** Evolutionary dynamics of variants showing substantial temporal variation for patient Z. Symbols and colors as in Fig S2.



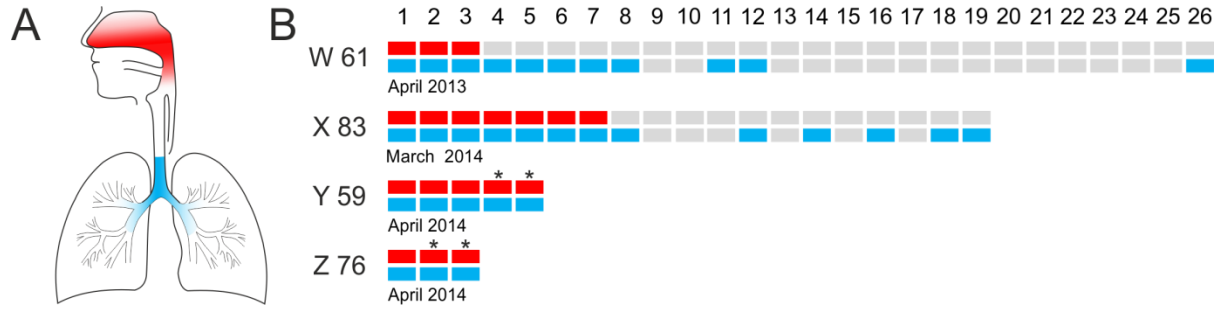

FIG 1

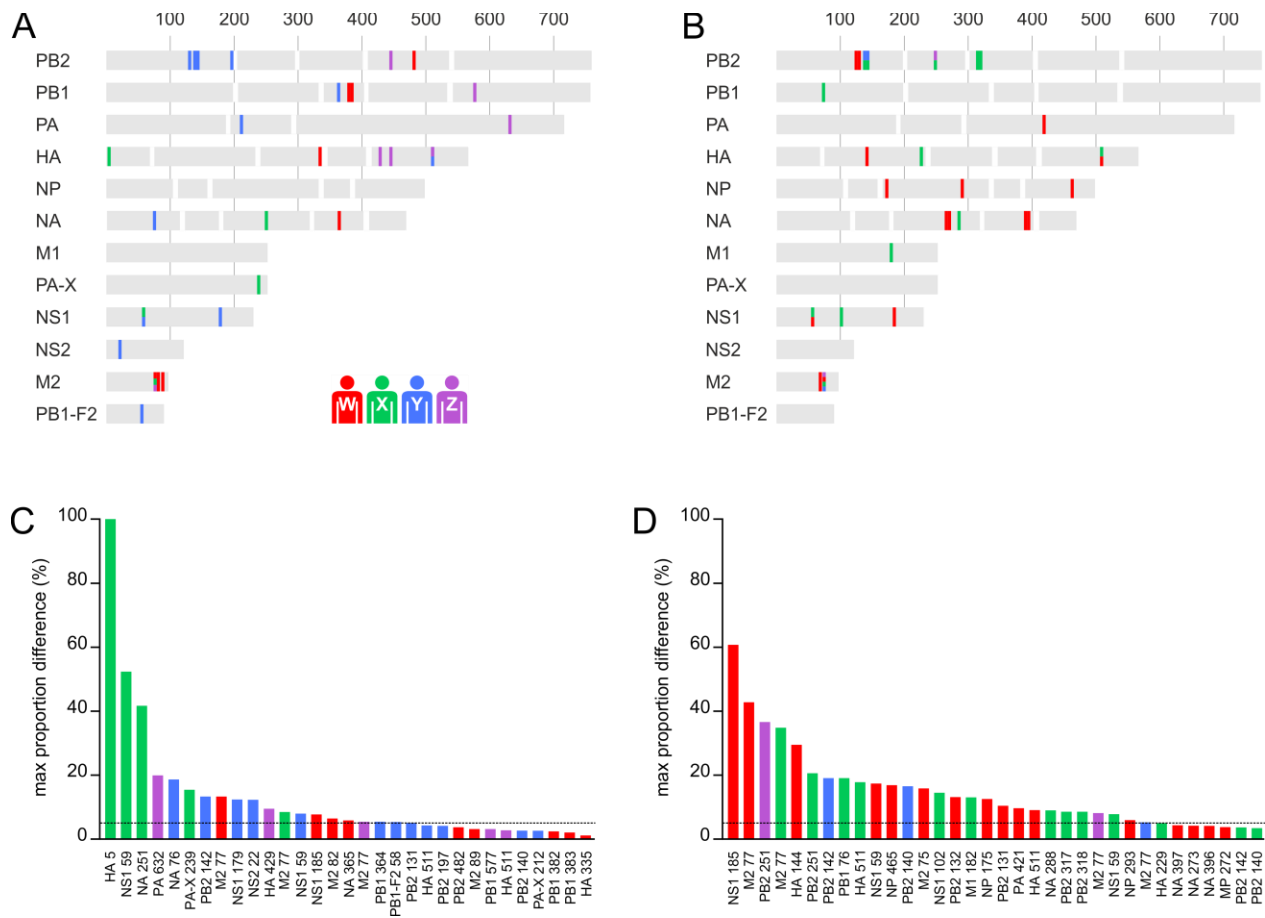

FIG 2

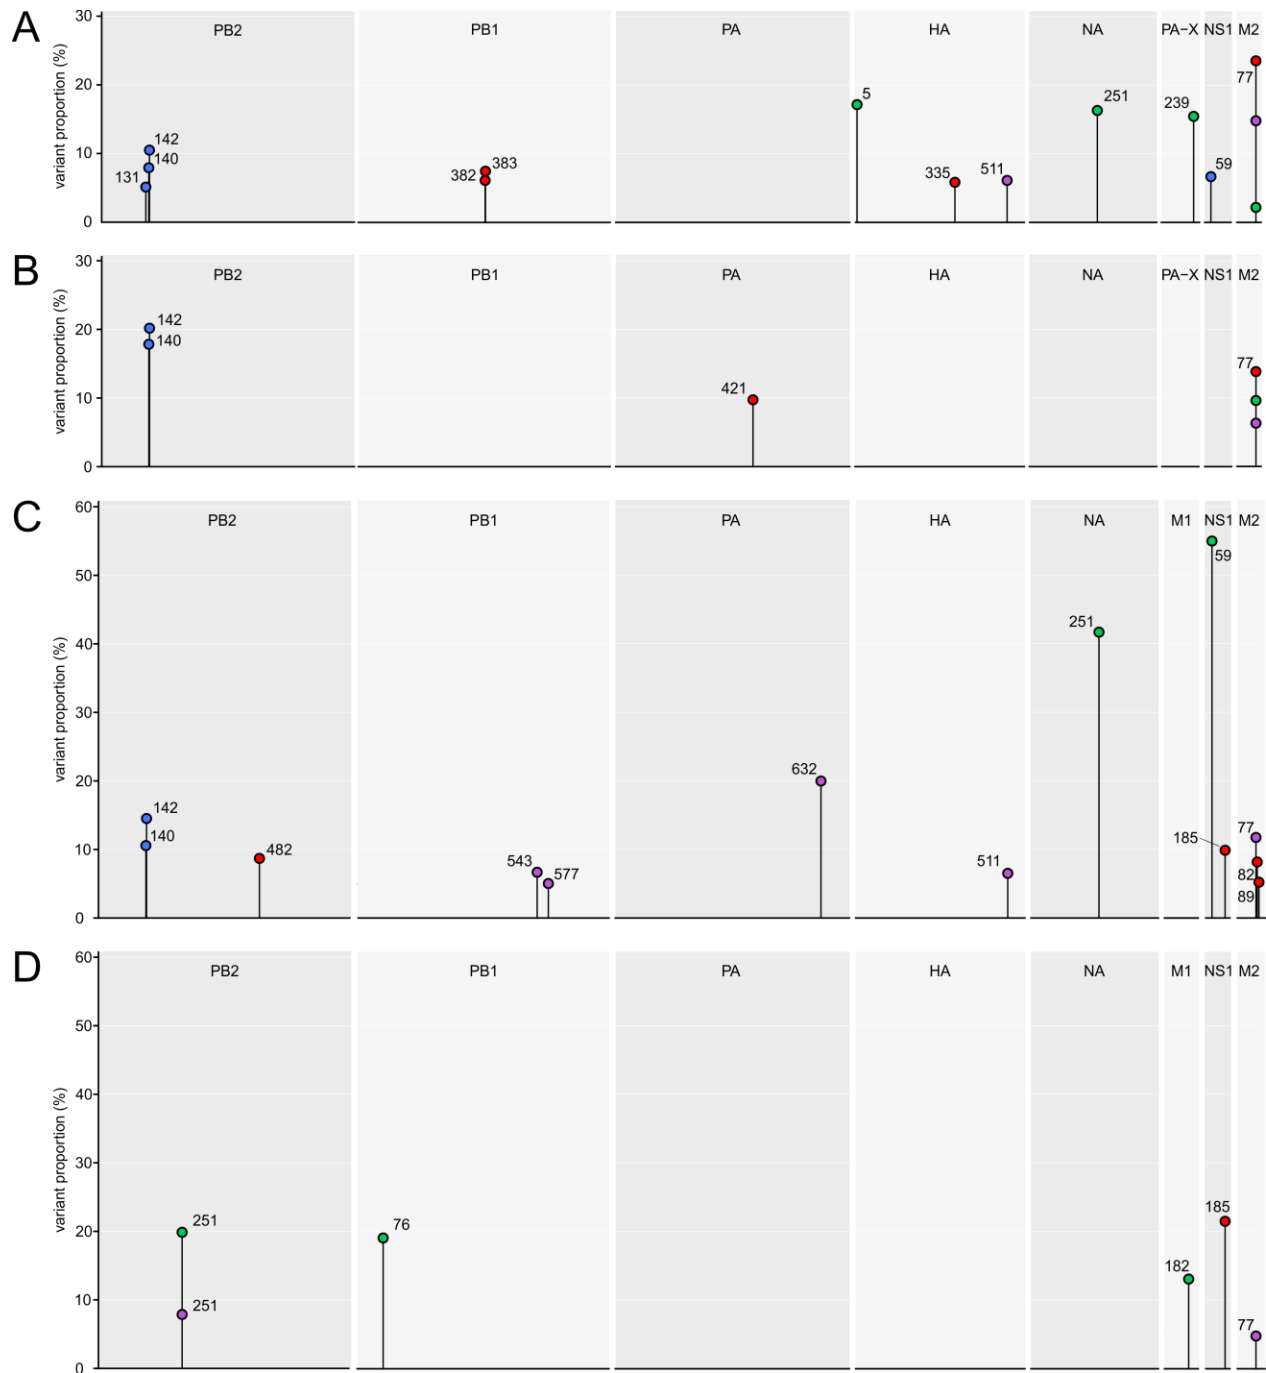

FIG 3

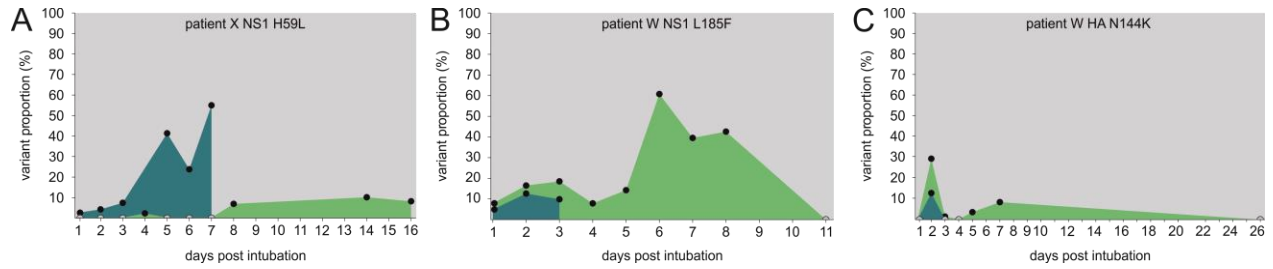

FIG 4

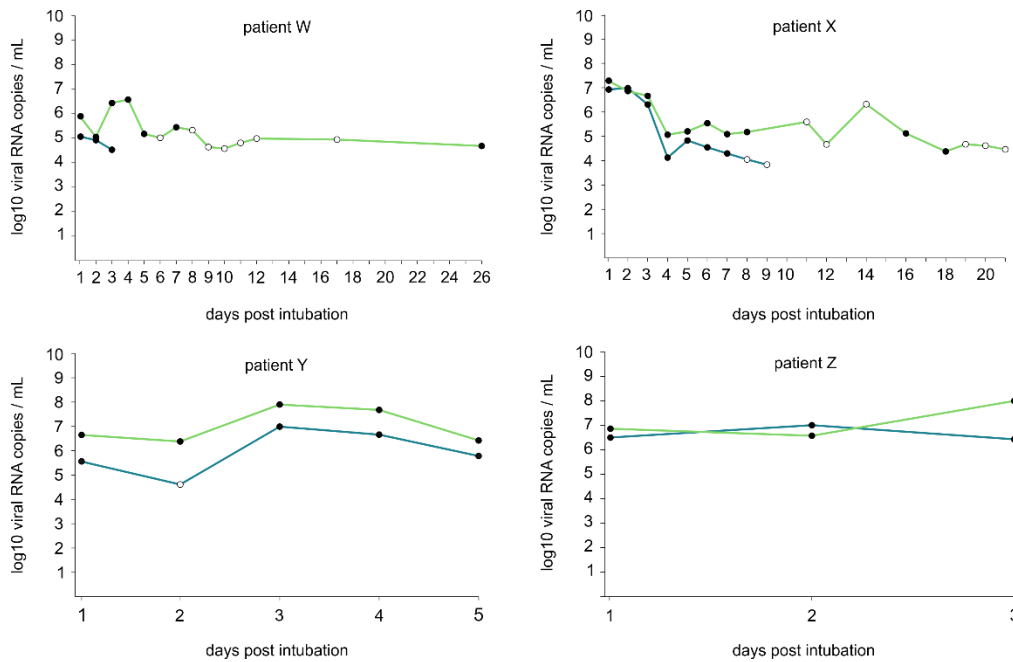

FIG S1

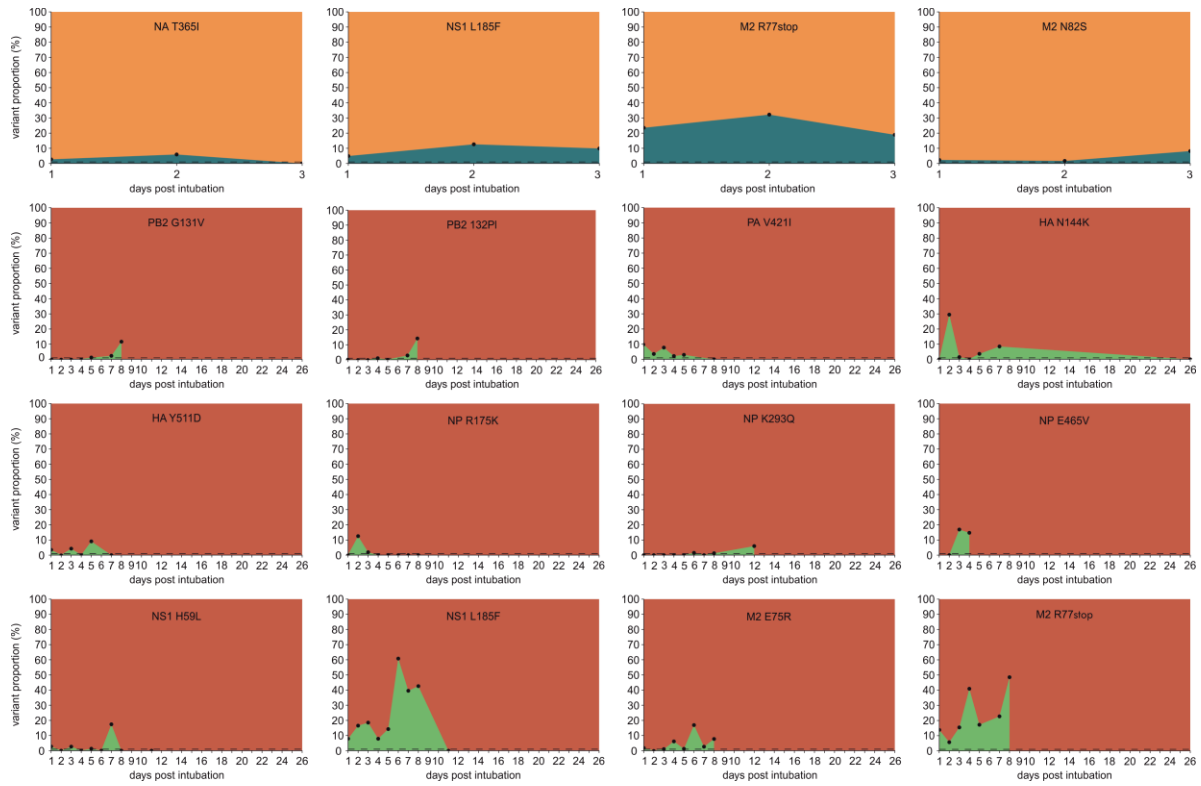

FIG S2

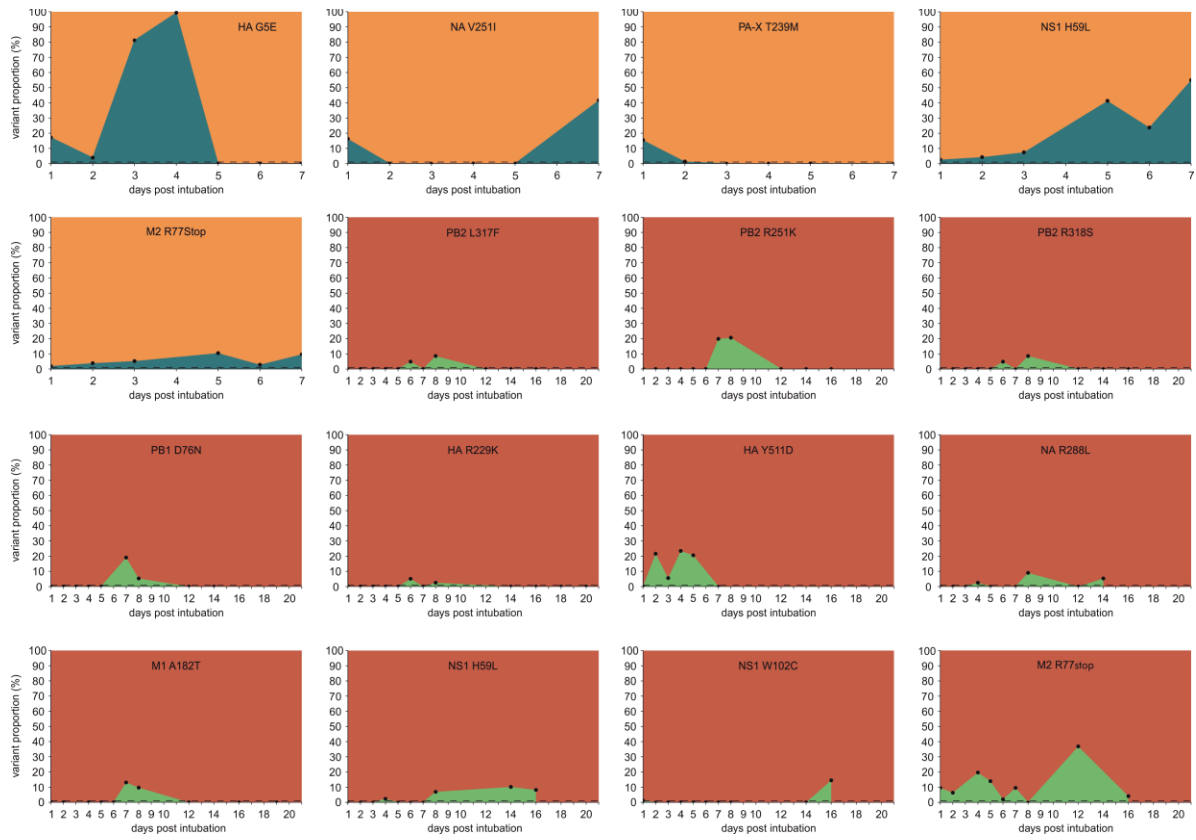

FIG S3

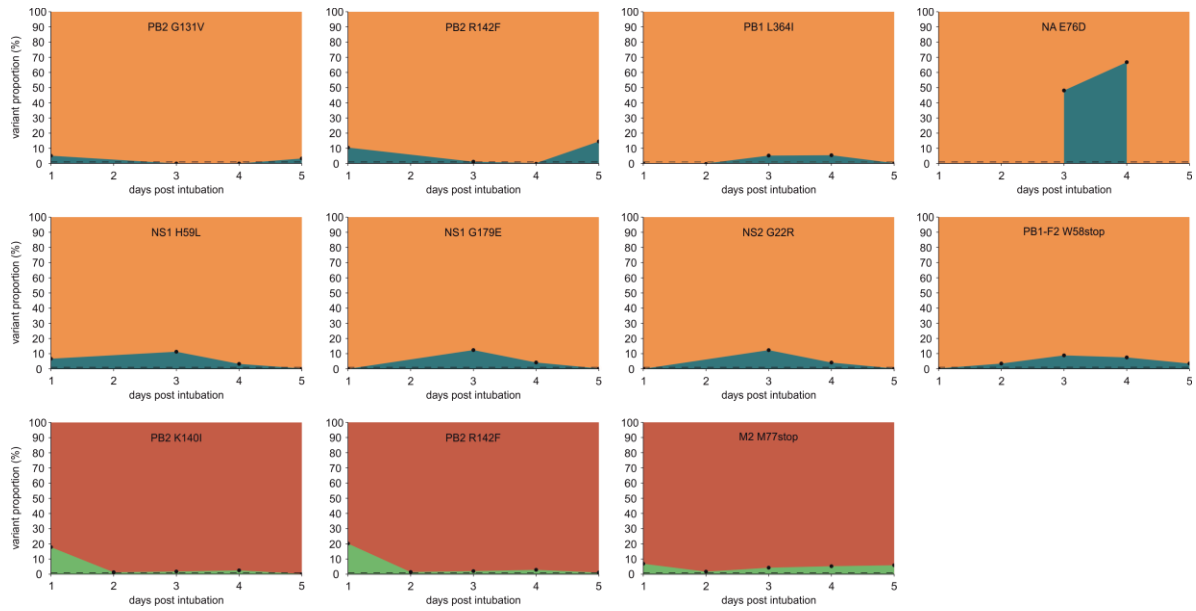

FIG S4

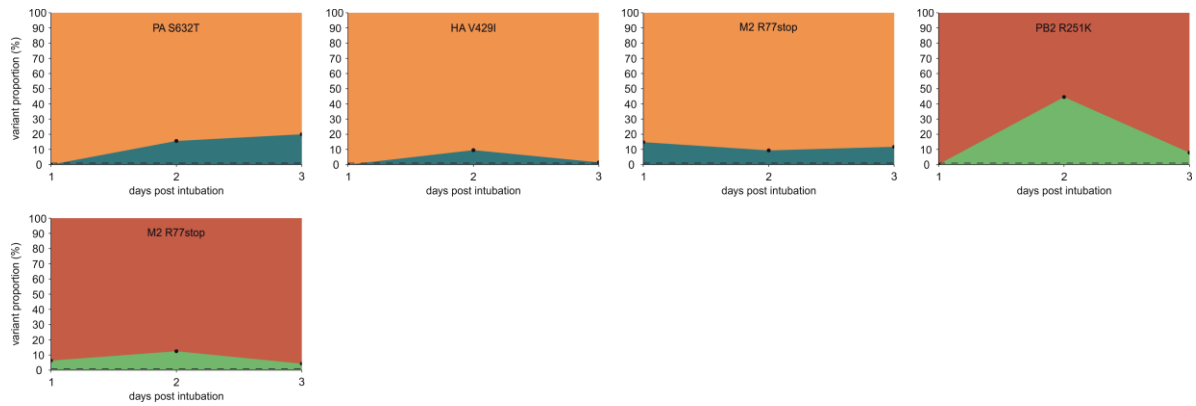

FIG S5

Table 1. Amino acid variants with temporal differences in variant proportion exceeding 5%.

| patient | sample type |               |                   |            |          |              |
|---------|-------------|---------------|-------------------|------------|----------|--------------|
|         | swabs       |               |                   | aspirates  |          |              |
| W       | PB2 482KR   | HA I335K      | M2 R77stop        | PB2 G131V  | NP H272C | NA I397Q     |
|         | PB1 N382H   | NA T365I      | M2 N82S           | PB2 P132L  | NP 273KR | NS1 H59L     |
|         | PB1 E383V   | NS1 L185F     | M2 S89G           | PA V421I   | NP K293Q | NS1 L185F    |
|         |             |               |                   | HA N144K   | NP E465V | M2 E75R      |
|         |             |               |                   | HA Y511D   | NA V396A | M2 R77stop   |
|         |             |               |                   | NP R175K   |          |              |
| X       | HA G5E      | NS1 H59L      |                   | PB2 K140I  | PB1 D76N | NS1 H59L     |
|         | NA V251I    | M2 R77stop    |                   | PB2 R142F  | HA R229K | NS1<br>W102C |
|         | PA-X T239M  |               |                   | PB2 R251K  | HA Y511D | M2 R77stop   |
|         |             |               |                   | PB2 L317F  | NA R288L |              |
|         |             |               |                   | PB2 R318S  | M1 A182T |              |
| Y       | PB2 G131V   | HA Y511D      | NS2 G22R          | PB2 K140I  |          |              |
|         | PB2 K140I   | NA E76D       | PB1-F2<br>W58stop | PB2 R142F  |          |              |
|         | PB2 R142F   | PA-X<br>V212A |                   | M2 R77stop |          |              |
|         | PB2 K197N   | NS1 H59L      |                   |            |          |              |
|         | PB1 L364I   | NS1 G179E     |                   |            |          |              |
| Z       | PB1 K577N   | HA V429I      | M2 R77stop        | PB2 R251K  |          |              |
|         | PA S632T    | HA Y511D      |                   | M2 R77stop |          |              |

The influenza virus proteins analyzed for this study are basic polymerase 2 (PB2), basic polymerase 1 (PB1), acidic polymerase (PA), hemagglutinin (HA), nucleoprotein (NP), neuraminidase (NA), matrix protein 1 (M1), acidic polymerase protein X (PA-X), non-structural protein 1 and 2 (NS1, NS2), matrix protein 2 (M2), and basic polymerase 1 frame 2 (PB1-F2). A/H3N2 virus HA numbering according to Burke *et al.* (28).



Table S1. Patient characteristics.

|                                        | patient W                          | patient X                          | patient Y           | patient Z                          |
|----------------------------------------|------------------------------------|------------------------------------|---------------------|------------------------------------|
| Reason of ICU admission                | Severe acute respiratory infection | Severe acute respiratory infection | Respiratory surgery | Severe acute respiratory infection |
| Comorbidities                          | none                               | none                               | none                | DMII, CHF                          |
| Age (years)                            | 61                                 | 83                                 | 59                  | 76                                 |
| Sex                                    | male                               | male                               | female              | female                             |
| Received oseltamivir                   | no                                 | no                                 | yes                 | yes                                |
| Clinical parameters (at ICU admission) |                                    |                                    |                     |                                    |
| Temperature (°C)                       | 38.9                               | 36.5                               | 36.7                | 34.3                               |
| Leucocytes (10 <sup>9</sup> /L)        | 10,6                               | 12,4                               | 11,9                | 24,8                               |
| CRP (mg/L)                             | 11                                 | 37                                 | 11                  | 41                                 |
| Consolidation on chest X-ray           | no                                 | no                                 | no                  | yes                                |
| APACHE II score                        | 24                                 | 30                                 | 14                  | 35                                 |
| SAPS II                                | 50                                 | 55                                 | 39                  | 62                                 |
| Clinical outcomes                      |                                    |                                    |                     |                                    |
| ICU length of stay (days)              | 37                                 | 26                                 | 6                   | 4                                  |
| Hospital length of stay (days)         | 86                                 | 34                                 | 13                  | 4                                  |
| Died during hospital admission         | no                                 | yes                                | no                  | yes                                |

Abbreviations: APACHE II = Acute Physiology and Chronic Health Evaluation II ; CHF = congestive heart failure; CRP = C-reactive protein; DMII = diabetes mellitus type II; ICU = intensive care unit; SAPS II = Simplified Acute Physiology Score II;
